# Supplementary material for: Bars, Nightclubs, and Cancer Prevention: New Approaches to Reduce Young Adult Cigarette Smoking
Source: PubMed Central journal article supplement — Am J Prev Med. Author manuscript; Available in PMC 2018 Sep 1. (PMC5835447; doi:10.1016/j.amepre.2017.03.026), 2017-09
Supplement: NIHMS923433-supplement-supplemental_file.pdf [file NIHMS923433-supplement-supplemental_file.pdf]

**Appendix Figure 1.** Differences between Hipster and Partier peer crowd marketing materials.

## DIFFERENCES BETWEEN HIPSTER AND PARTIER PEER CROWD MARKETING MATERIALS



**A SOCIAL BRANDING CAMPAIGN TO REDUCE HIPSTER TOBACCO USE**

Messages focused on abstract facts that exposed the tobacco industry's negative impacts on the environment, animal abuse, and world hunger. Designs were more artistic, diverse, and less polished.



**NATURAL BEAUTY IS FLEETING**  
 FACT: 4.6 TRILLION CIGARETTE BUTTS ARE THROWN BY THE GROUND IN 80 BILLION OF PAPER CIGARETTES YEAR. THERE ARE 7 BILLION PEOPLE IN THE WORLD. THAT MEANS THAT EVERY PERSON IN THE WORLD WOULD NEED TO PICK UP 666 CIGARETTE BUTTS A YEAR TO RID THE EARTH OF CIGARETTE LITTER.

**DEMO**  
 "Probably Leads Dull Existence"  
 FACT: THESE ARE ALL TERMS TAKEN FROM BIG TOBACCO'S FILES THAT HAVE BEEN USED TO DESCRIBE DIFFERENT GROUPS OF POTENTIAL CUSTOMERS FOR THEIR NICOTINE ADDICTIVE PRODUCTS.  
 You Are Our CUSTOMER

**PRIMITIVE MORALITY**  
 FACT: THE TOBACCO INDUSTRY ASSES ITS REVENUES TO TEST TOBACCO PRODUCTS ON DOGS, RABBITS, MICE & MONKEYS. IN ONE STUDY IN 2006, MONKEYS WERE KILLED TO EXAMINE THE EFFECT OF NICOTINE ON THEIR BRAINS.



**A SOCIAL BRANDING CAMPAIGN TO REDUCE PARTIER TOBACCO USE**

Messages focused on tangible and short-term facts including smoking's effects on appearance, dating, and sexual performance. Designs were more polished, consistent, and trendy.



**YOU'RE DEAD, SEXY**  
 THE TOBACCO INDUSTRY WANTS YOU TO THINK SMOKING IS GLAMOROUS AND SEXY. IN REALITY, BEAUTY IS IN THE EYE OF THE BEHOLDER AND 4 OUT OF 5 PARTNERS PREFER TO DATE A NONSMOKER. UNLESS THE TOBACCO INDUSTRY, SMOKEFREE GUYS AND GIRLS DON'T NEED TO FAKE IT. THEY JUST SIMPLY ARE HOTTER.

**WOLF IN SHEEP'S CLOTHING**  
 THE TOBACCO INDUSTRY ADDS AMMONIA TO CIGARETTES, INCREASING THE AMOUNT OF NICOTINE THAT GOES TO YOUR BRAIN, CREATING A MORE POWERFUL ADDICTION. LET THE MUSIC PUT A SPELL ON YOU, NOT NICOTINE.  
 PARTY WILD, SEXY AND SMOKEFREE.

**SMOKE**  
 SMOKE KILLS. IT'S NOT JUST A WORD. IT'S A FACT. SMOKE KILLS. IT'S NOT JUST A WORD. IT'S A FACT. SMOKE KILLS. IT'S NOT JUST A WORD. IT'S A FACT.
